# Supplementary material for: A universal surface enhanced Raman spectroscopy (SERS)-active graphene cathode for lithium–air batteries
Source: Royal Society of Chemistry journal article supplement (doi:10.1039/c6ra23331g), 2016-01-01
Supplement: c6ra23331g1.pdf [file c6ra23331g1.pdf]

**Electronic Supplementary Material (ESI)**

**A Universal Surface Enhanced Raman Spectroscopy (SERS)-Active Graphene Cathode for  
Lithium-Air Battery**

Kewei Liu<sup>†</sup>, Zitian Yu<sup>†</sup>, Xiaowen Zhu, Shuo Zhang, Feng Zou, and Yu Zhu<sup>\*</sup>

Department of Polymer Science, the University of Akron, 170 University Circle, Akron, Ohio  
44325-3909, United States

<sup>\*</sup>Address correspondence to: Yu Zhu (yu.zhu@uakron.edu)

<sup>†</sup>These authors contributed equally to this work.

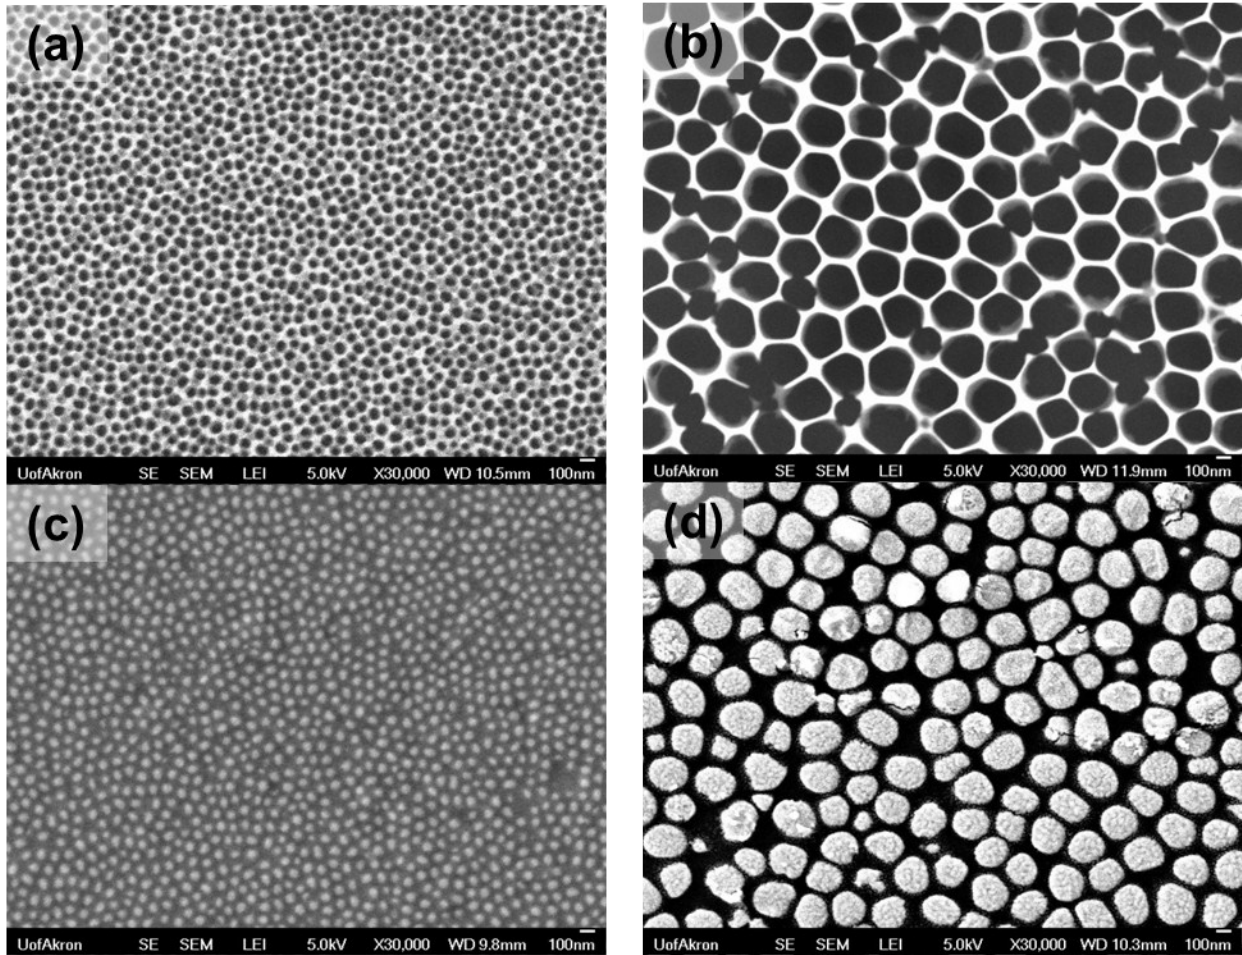

Fig. S1 a) Small pore size AAO membrane. b) Large pore size AAO membrane. c) Small size gold nano-dots obtained from small pore size AAO. d) Large size gold nano-dots obtained from large pore size AAO.

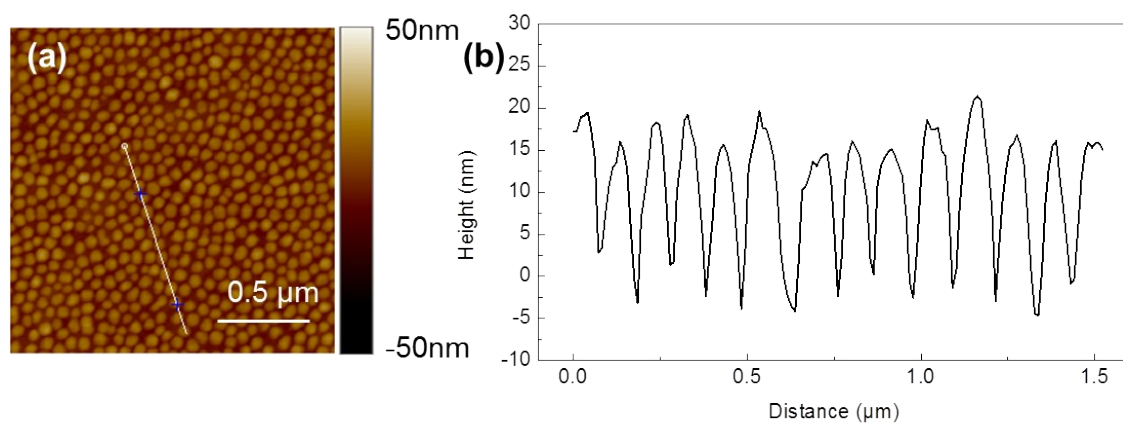

Fig. S2 AFM height image a), and height profile b), of small gold nano-dots on graphene electrode.

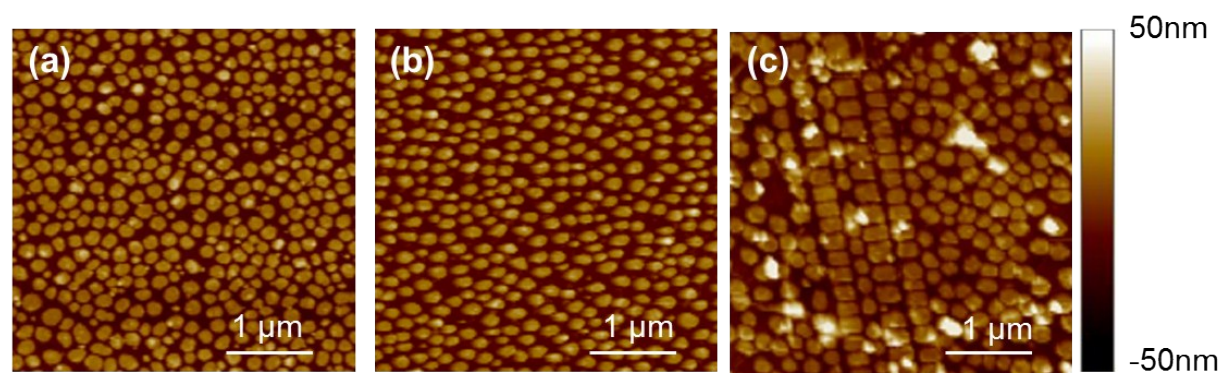

Fig. S3 AFM characterizations of large gold nano-dots obtained from AAO templates on Si a); Gold b) and Graphene electrode c).

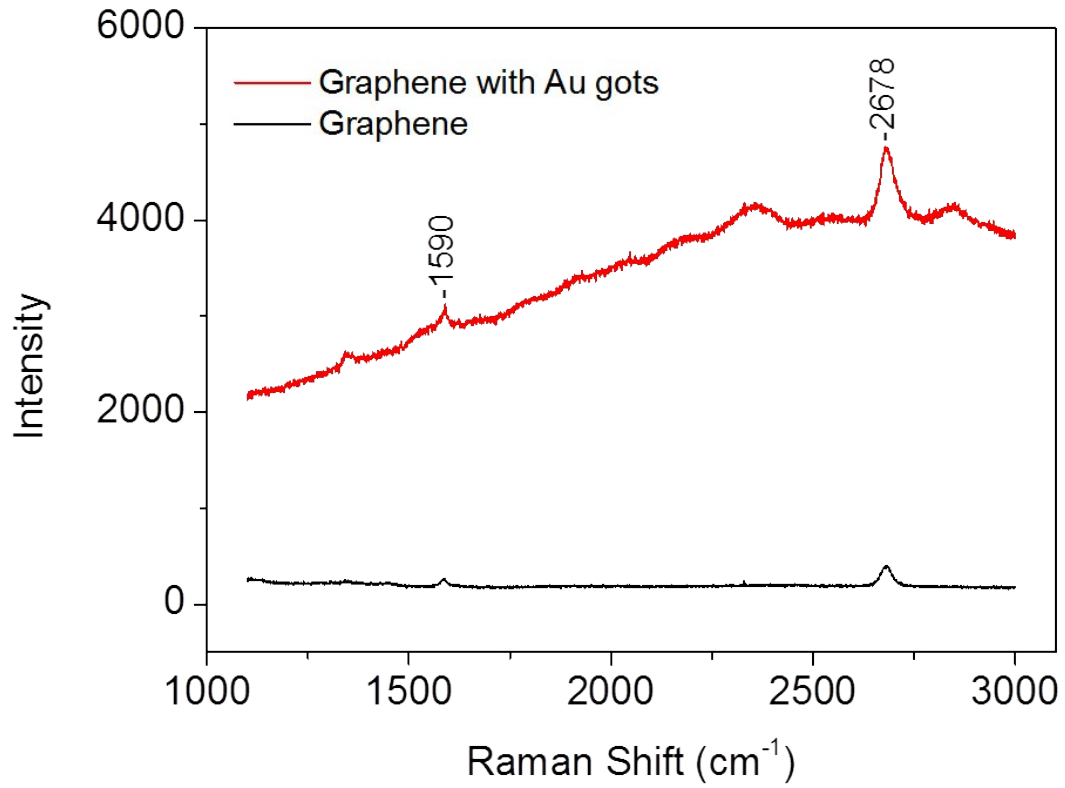

Fig. S4 Raman spectra of normal graphene electrode and graphene SERS electrode.

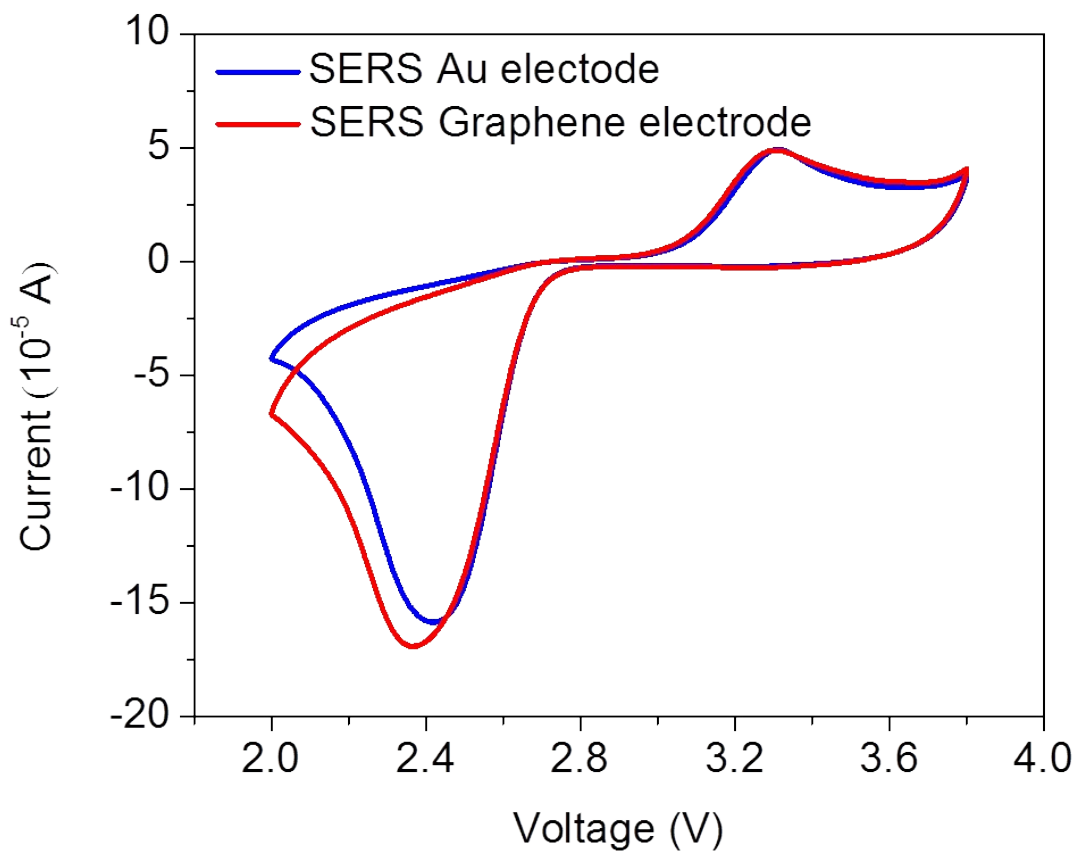

Fig. S5 Cyclic voltammogram of the Li-O<sub>2</sub> battery with SERS electrodes.

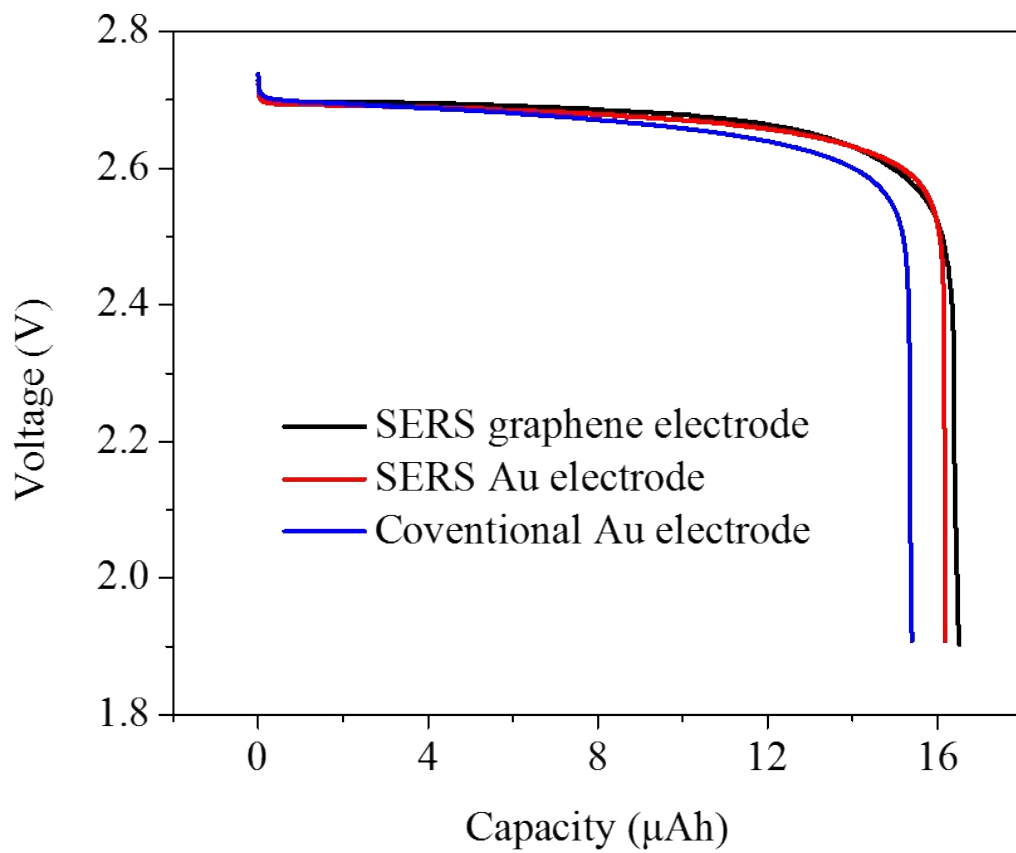

Fig. S6 Discharge curve of the Li-O<sub>2</sub> battery with SERS electrodes.
